# Supplementary material for: Mid-infrared InAs/InP quantum-dot lasers
Source: Springer Nature journal article supplement (doi:10.1038/s41377-025-02167-4), 2026-01-12
Supplement: MOESM1 [file 41377_2025_2167_MOESM1_ESM.pdf]

## **Supplementary Information for**

### **Mid-infrared InAs/InP quantum-dot lasers**

Yangqian Wang<sup>1</sup>, Hui Jia<sup>1,\*</sup>, Jae-Seong Park<sup>1,\*</sup>, Haotian Zeng<sup>1</sup>, Igor P. Marko<sup>2</sup>, Matthew Bentley<sup>3</sup>, Khalil El Hajraoui<sup>4,5</sup>, Shangfeng Liu<sup>6</sup>, Bo Yang<sup>7</sup>, Calum Dear<sup>1</sup>, Mengxun Bai<sup>1</sup>, Huiwen Deng<sup>1</sup>, Chong Chen<sup>1</sup>, Jiajing Yuan<sup>1</sup>, Jun Li<sup>1</sup>, Kongming Liu<sup>1</sup>, Dominic A. Duffy<sup>2</sup>, Zhao Yan<sup>6</sup>, Zihao Wang<sup>7</sup>, Stephen J. Sweeney<sup>2</sup>, Qiandong Zhuang<sup>3</sup>, Quentin M. Ramasse<sup>4,8</sup>, Siming Chen<sup>1</sup>, Mingchu Tang<sup>1</sup>, Qiang Li<sup>6</sup>, Alwyn Seeds<sup>1</sup>, and Huiyun Liu<sup>1</sup>

<sup>1</sup>Department of Electronic and Electrical Engineering, University College London, London, UK

<sup>2</sup>James Watt School of Engineering, University of Glasgow, Glasgow, UK

<sup>3</sup>Physics Department, Lancaster University, Lancaster, UK

<sup>4</sup>SuperSTEM, SciTech Daresbury Science and Innovation Campus, Block J, Keckwick Lane, Daresbury, UK

<sup>5</sup>York NanoCentre & Department of Physics, University of York, York, UK

<sup>6</sup>School of Physics and Astronomy, Cardiff University, Cardiff, UK

<sup>7</sup>Institute of Physics, Chinese Academy of Sciences, Beijing, China

<sup>8</sup>School of Chemical and Process Engineering and School of Physics and Astronomy, University of Leeds, Leeds, UK

These authors contributed equally: Yangqian Wang, Hui Jia, and Jae-Seong Park

\*Correspondence: Hui Jia ([hui.jia@ucl.ac.uk](mailto:hui.jia@ucl.ac.uk)) or Jae-Seong Park ([jae-seong.park@ucl.ac.uk](mailto:jae-seong.park@ucl.ac.uk))

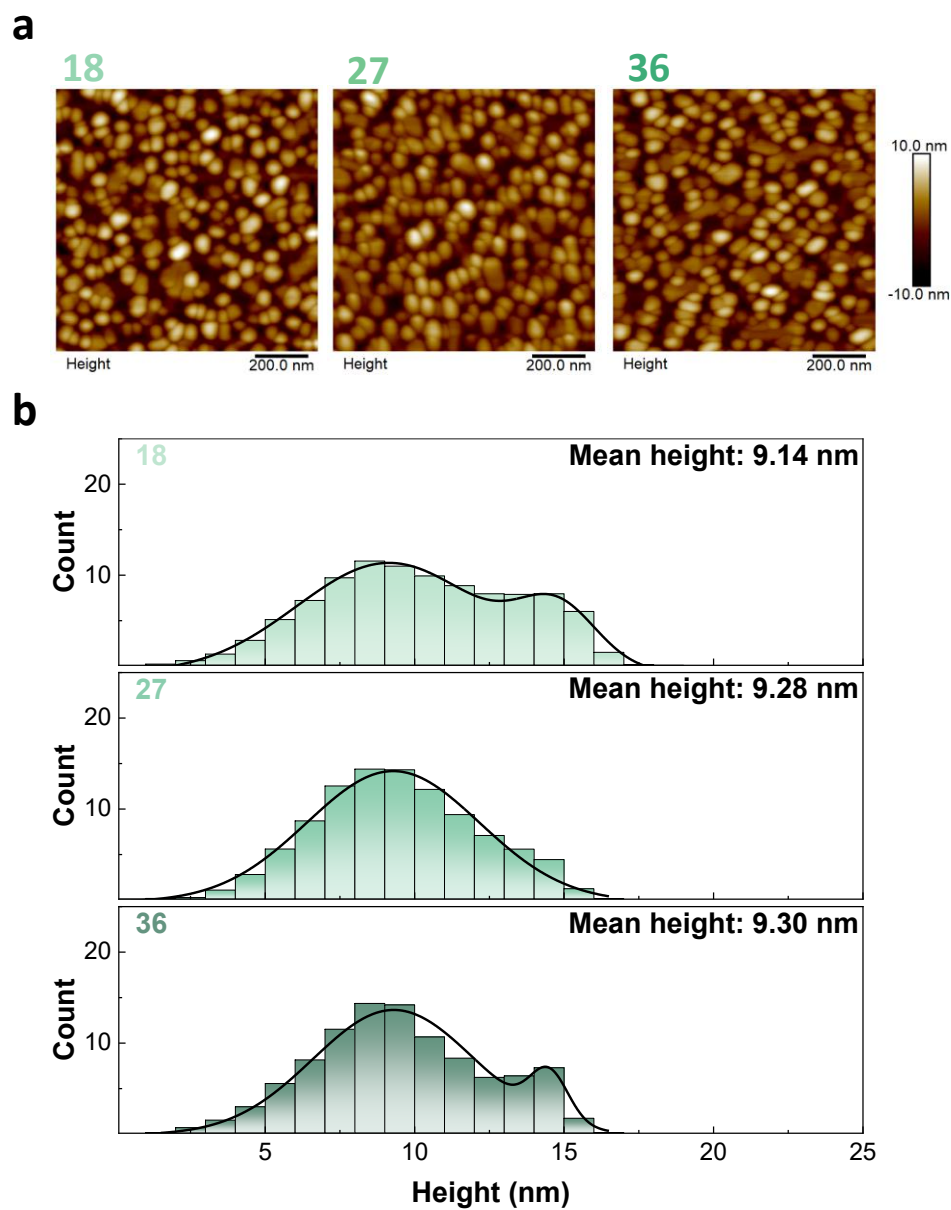

**Figure S1. Optimization of dot morphology of single-layer InAs/InP QDs under different V/III ratios. a**  $1 \times 1 \mu\text{m}^2$  AFM scans and **b** dot-height distribution for single-layer InAs/InP QDs grown at 485 °C with 7.5 ML of InAs, under V/III ratios of 18, 27, and 36.

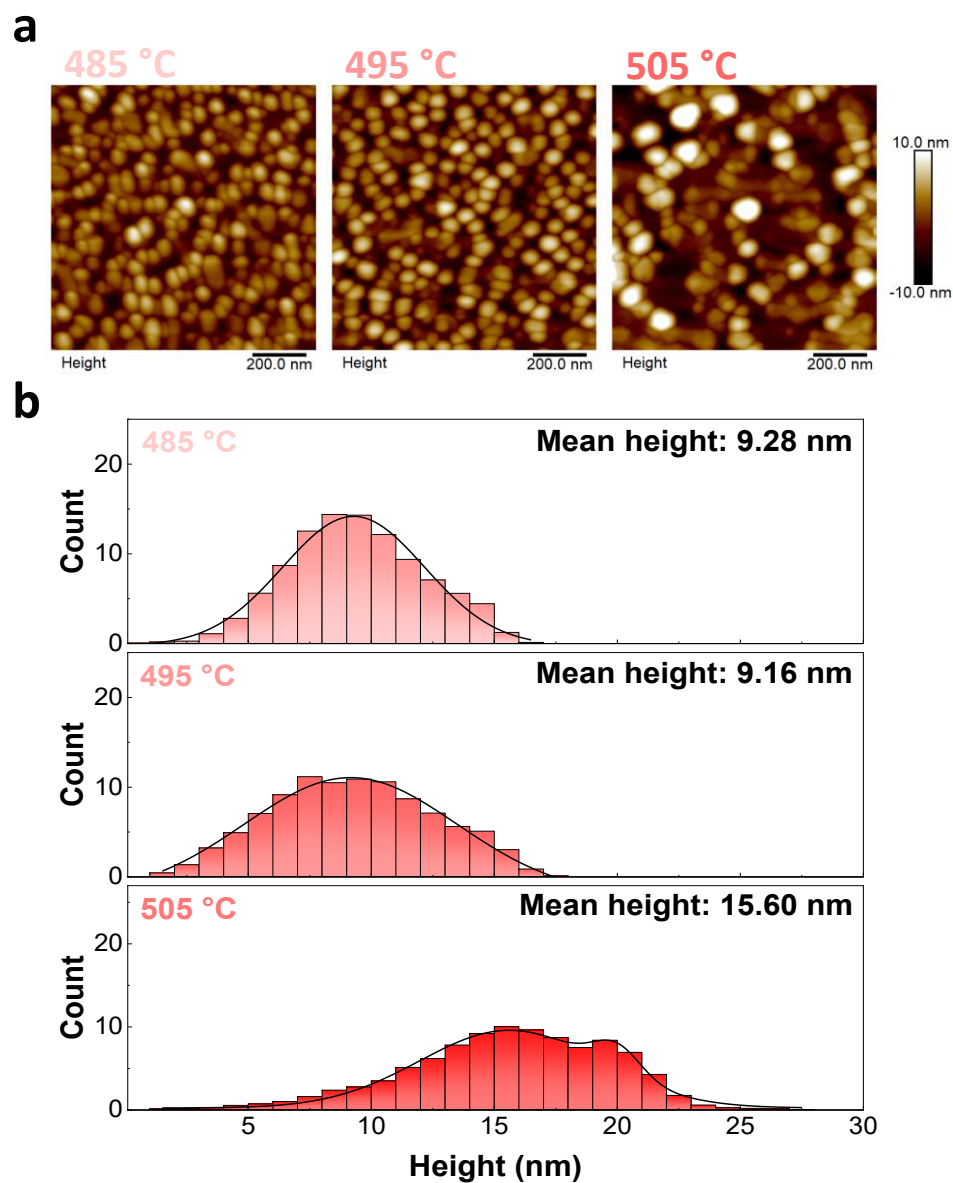

**Figure S2. Optimization of dot morphology of single-layer InAs/InP QDs at different QD growth temperatures.** **a**  $1 \times 1 \mu\text{m}^2$  AFM scans and **b** dot-height distribution for single-layer InAs/InP QDs with 7.5 ML of InAs and V/III ratio of 27, grown at temperatures of 485, 495, and 505 °C.

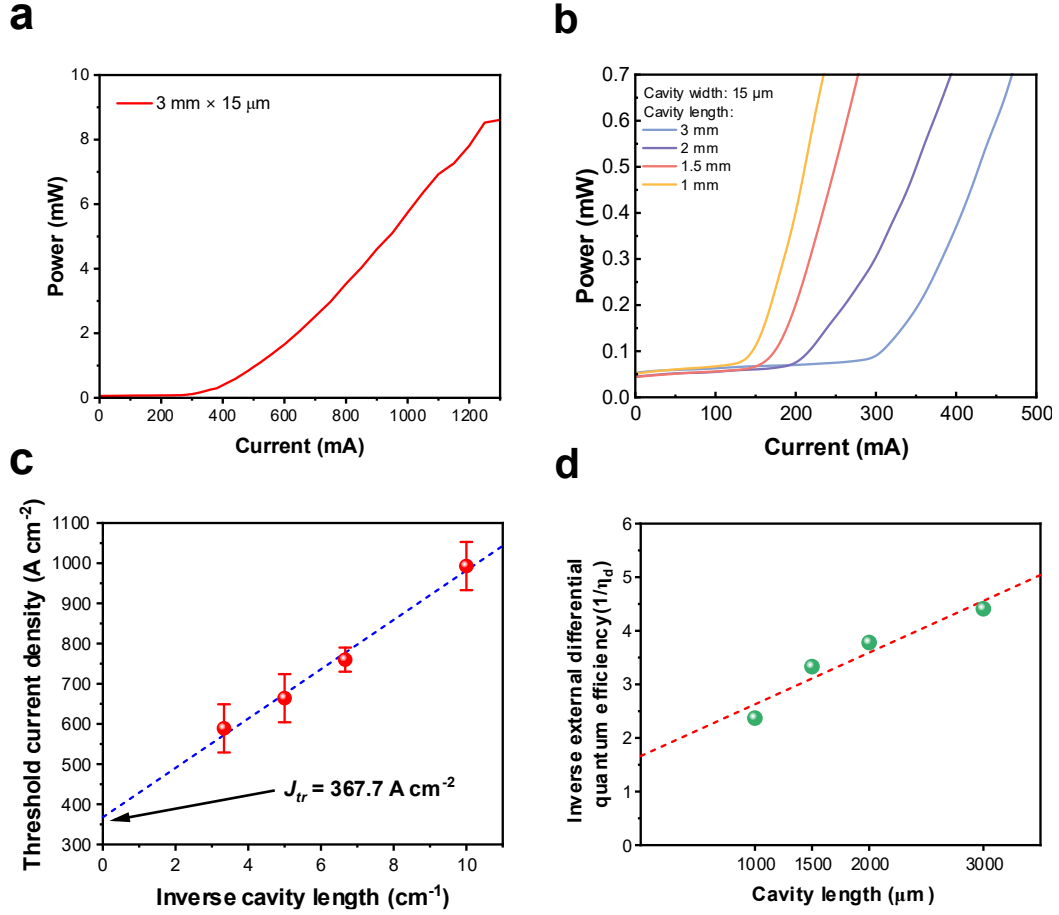

**Figure S3. Laser performance characterization with varied cavity lengths.** **a** Power versus current (L-I) curve for the 3 mm × 15 μm device at RT, showing a maximum power of 8.5 mW per facet. **b** RT L-I curves for InAs/InP QD lasers with a cavity width of 15 μm and varied cavity length from 1 to 3 mm. **c**  $J_{th}$  versus inverse cavity length for InAs/InP QD lasers, providing transparency current density ( $J_{tr}$ ). The error bars indicate the total observed range (minimum to maximum) of  $J_{th}$  for all measured devices at each cavity length. **d** Inverse external differential quantum efficiency ( $1/\eta_d$ ) versus cavity length for the InAs/InP QD lasers, where internal quantum efficiency ( $\eta_i$ ) of 60 % and internal loss ( $\alpha_i$ ) of  $6.7 \text{ cm}^{-1}$  were calculated.

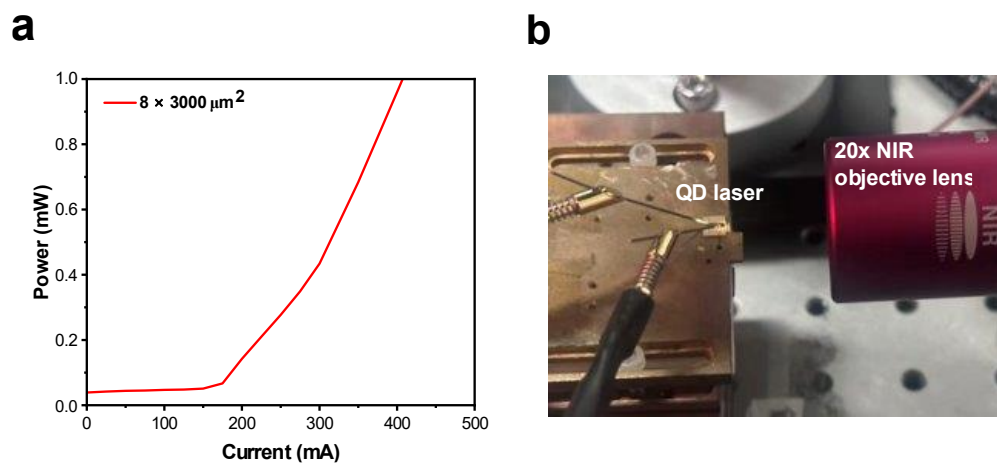

**Figure S4. Far-field diffraction pattern measurement.** **a** L-I curve at RT for the  $3 \text{ mm} \times 8 \mu\text{m}$  device used for far-field pattern measurement, showing a  $I_{\text{th}}$  of  $\sim 175 \text{ mA}$ . **b** The set-up for far-field pattern measurement.
